# Supplementary material for: Stream grazers determine their crawling direction on the basis of chemical and particulate microalgal cues
Source: PeerJ. 2014 Aug 21;2:e503. doi: 10.7717/peerj.503 (PMC4145069; doi:10.7717/peerj.503)
Supplement: Appendix S1 — The raw data of the all experiments for combining 3 treatments. [file peerj-02-503-s001.xlsx]

## Sheet: Sheet1
Supproting dataset: The raw data of the all experiments for combining 3 treatments
Treatment set	Left tank	Selected individuals	Right tank	Selected individuals
1	Suspended	6	Control	2
2	Suspended	7	Control	1
3	Suspended	6	Control	2
4	Control	1	Suspended	7
5	Dissolved	3	Control	5
6	Dissolved	5	Control	3
7	Dissolved	4	Control	4
8	Control	3	Dissolved	5
9	Control	3	Dissolved	5
10	Dissolved	2	Suspended	6
11	Dissolved	1	Suspended	7
12	Suspended	4	Dissolved	4
13	Suspended	2	Dissolved	6
14	Control	3	Suspended	5
15	Control	1	Suspended	7
16	Control	1	Suspended	7
17	Suspended	7	Control	1
18	Dissolved	5	Control	3
19	Control	1	Dissolved	7
20	Control	4	Dissolved	4
21	Dissolved	4	Suspended	4
22	Dissolved	5	Suspended	3
23	Suspended	5	Dissolved	3
24	Suspended	5	Dissolved	3
25	Control	1	Dissolved	7
26	Dissolved	4	Control	4
27	Suspended	6	Control	2
28	Control	4	Suspended	4
29	Dissolved	2	Suspended	6
30	Suspended	4	Dissolved	4
